# Supplementary material
Source: PubMed Central journal article supplement (PMC2755871)

## Supplement Figure Legends

**Supplement Figure 1. Rdh12 immunolocalization dark-adapted and light-adapted mouse retina.** Wild-type mice (albino L/L) were maintained in darkness overnight or exposed to 2000 lux fluorescent white light for 2 h. Retina/RPE/choroid cryosections were incubated with primary antibody specific for mouse Rdh12 or transducin, and then with streptavidin-AlexaFluor-488 (green) and -555 (red), respectively. DAPI (blue) was used to label cell nuclei. Sections were imaged using fluorescence confocal microscopy. D.A., dark-adapted; L.A., light-adapted. OS, outer segments; IS, inner segments; ONL, outer nuclear layer; OPL, outer plexiform layer; INL, inner nuclear layer; IPL, inner plexiform layer; GCL, ganglion cell layer.

**Supplement Figure 2. Retinal histology and ONL thickness in Rdh12-deficient and wild-type mice at advanced age and on various genetic backgrounds.** Measurements of ONL thickness were obtained from plastic sections of retina parallel to the vertical meridian of the eye and plotted vs. distance from the optic nerve head  $\pm$  std. dev. (n=3). Phase contrast micrographs show representative Lee's stained retina/RPE/choroid sections (7  $\mu$ m) from central retina. (A) *Rdh12*<sup>-/-</sup> and wild-type (pigmented L/L; ~20 mo old). (B) *Rdh12*<sup>-/-</sup> and wild-type (pigmented M/M; ~20 mo old). (C) *Rdh12*<sup>-/-</sup> and wild-type (albino L/L, ~6 mo old). (D) *Rdh12*<sup>-/-</sup> and wild-type mice heterozygous for the *Sod2* gene (pigmented M/M; ~9 mo old). *Rdh12*<sup>-/-</sup>, ○; wild-type, ●. Retina layers labeled as in Supplement Fig. 1.

Supplement Figure 1

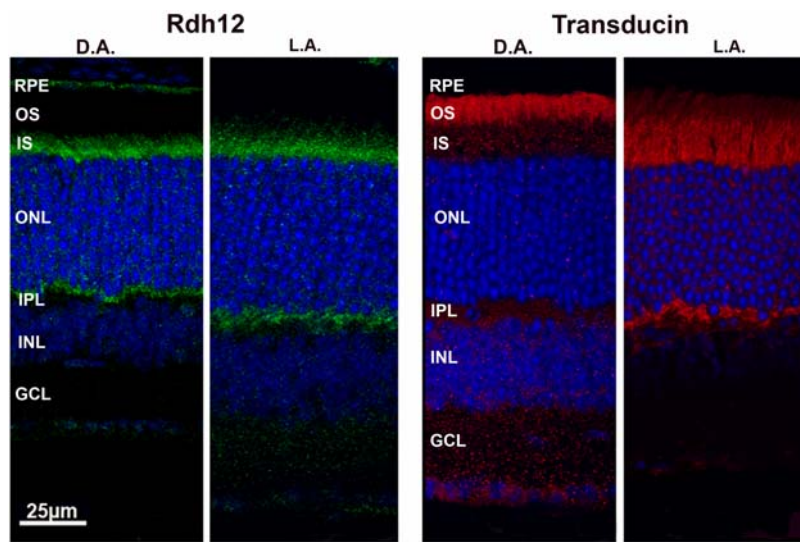

Supplement Figure 2

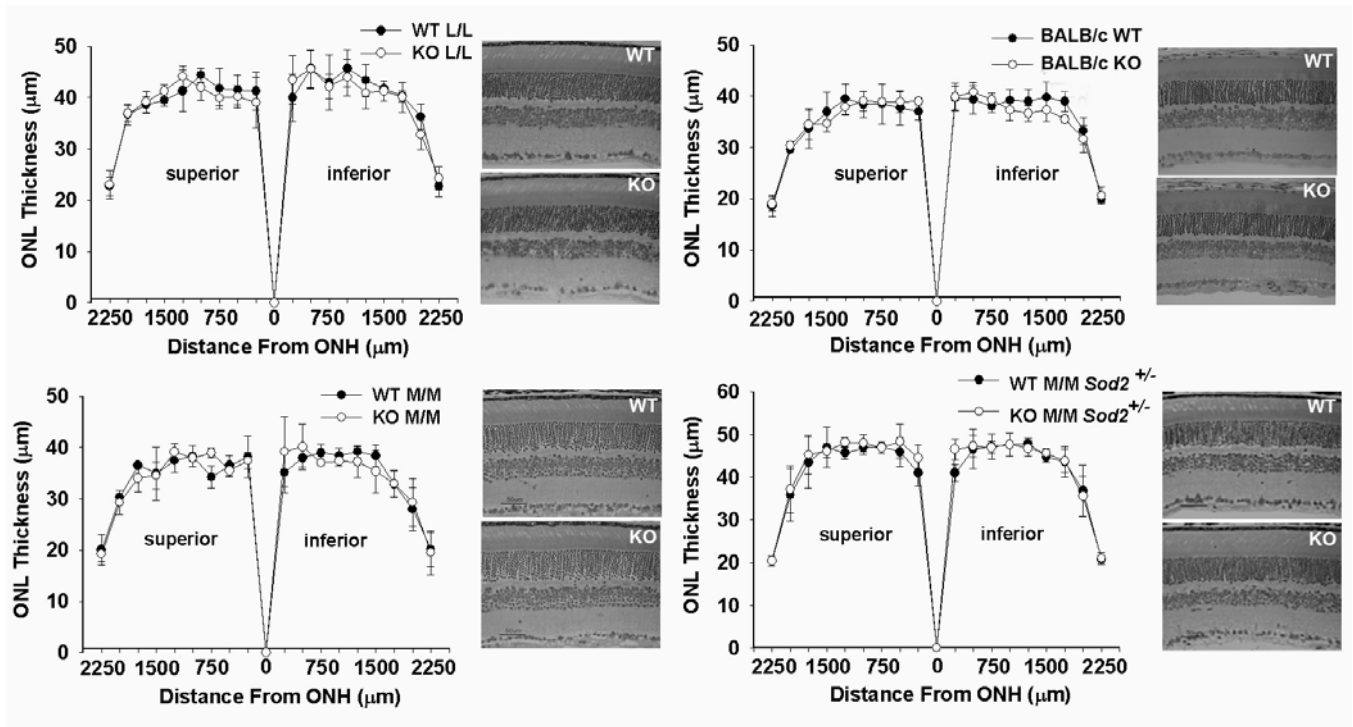

Supplement: supp_M109.020966_jbc.M109.020966-1.pdf [file supp_M109.020966_jbc.M109.020966-1.pdf]
